# Supplementary material for: Nitrogen doped nanoflower porous carbon as a nonmetal catalyst for acetylene hydrochlorination
Source: Royal Society of Chemistry journal article supplement (doi:10.1039/c8nj04410d), 2018-01-01
Supplement: c8nj04410d1.pdf [file c8nj04410d1.pdf]

**Nitrogen doped nanoflower porous carbon as nonmetal catalyst for  
acetylene hydrochlorination**

Wanrong Liu <sup>a</sup>, Mingyuan Zhu <sup>a, b, \*</sup>, Bin Dai <sup>a, b</sup>

<sup>a</sup> School of Chemistry and Chemical Engineering, Shihezi University, Shihezi,  
Xinjiang 832003, P. R. China

<sup>b</sup> Key Laboratory for Green Processing of Chemical Engineering of Xinjiang  
Bingtuan, Shihezi, Xinjiang 832003, P. R. China

\* Corresponding Author Phone: +86 9932057270; Fax: +86 9932057210;

E-mail: zhumin yuan@shzu.edu.cn (Mingyuan Zhu);

---

| sample           | D(nm) | S <sub>BET</sub> (m <sup>2</sup> g <sup>-1</sup> ) | V(cm <sup>3</sup> g <sup>-1</sup> ) |
|------------------|-------|----------------------------------------------------|-------------------------------------|
| <b>BTDA-BZD</b>  | 3.21  | 581                                                | 0.47                                |
| <b>BPDA-BZD</b>  | 3.15  | 197                                                | 0.15                                |
| <b>BTDA-pPDA</b> | 2.61  | 166.3                                              | 0.69                                |
| <b>PMDA-BZD</b>  | 4.18  | 176.3                                              | 0.18                                |

---

Table S1: Texture parameters of the samples.

Fig. S1. SEM images of NPC-T catalysts. (a) 500°C, (b) 600°C (c)700°C, (d) 800°C, (e) 900°C, (f) 1,000°C.
